# Supplementary material for: Drosophila Morgue Associates with SkpA and Polyubiquitin In Vivo
Source: PubMed Central journal article supplement (PMC3787007; doi:10.1371/journal.pone.0074860), 2013-09-30

Supplemental Figure 1.

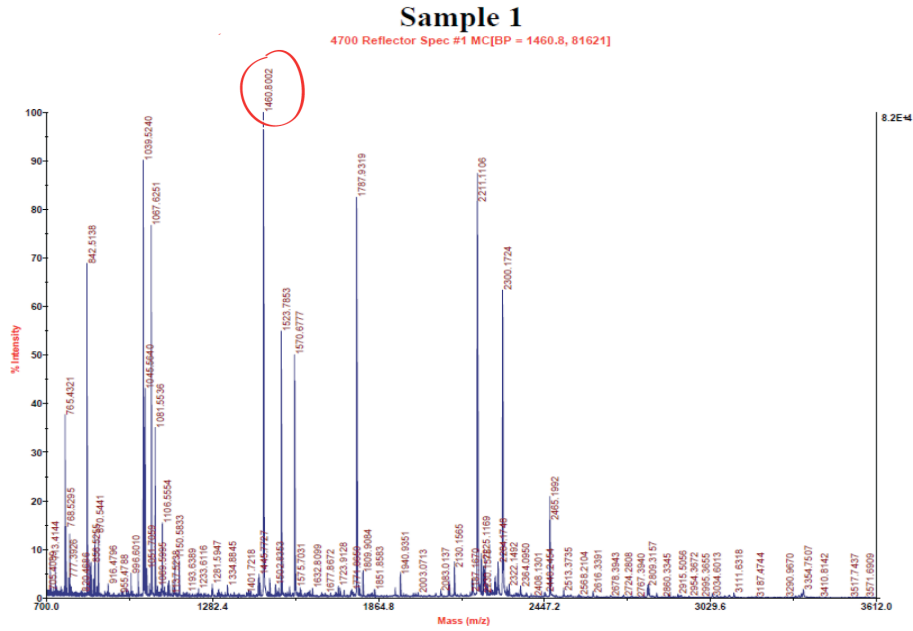

Supplement: pone.0074860.s001.pdf [file pone.0074860.s001.pdf]
